# Supplementary material for: Inhibitor of CD147 Suppresses T Cell Activation and Recruitment in CVB3-Induced Acute Viral Myocarditis
Source: MDPI journal article supplement (doi:10.3390/v15051137), 2023-05-10
Supplement: s1 [file s1]

Supplements

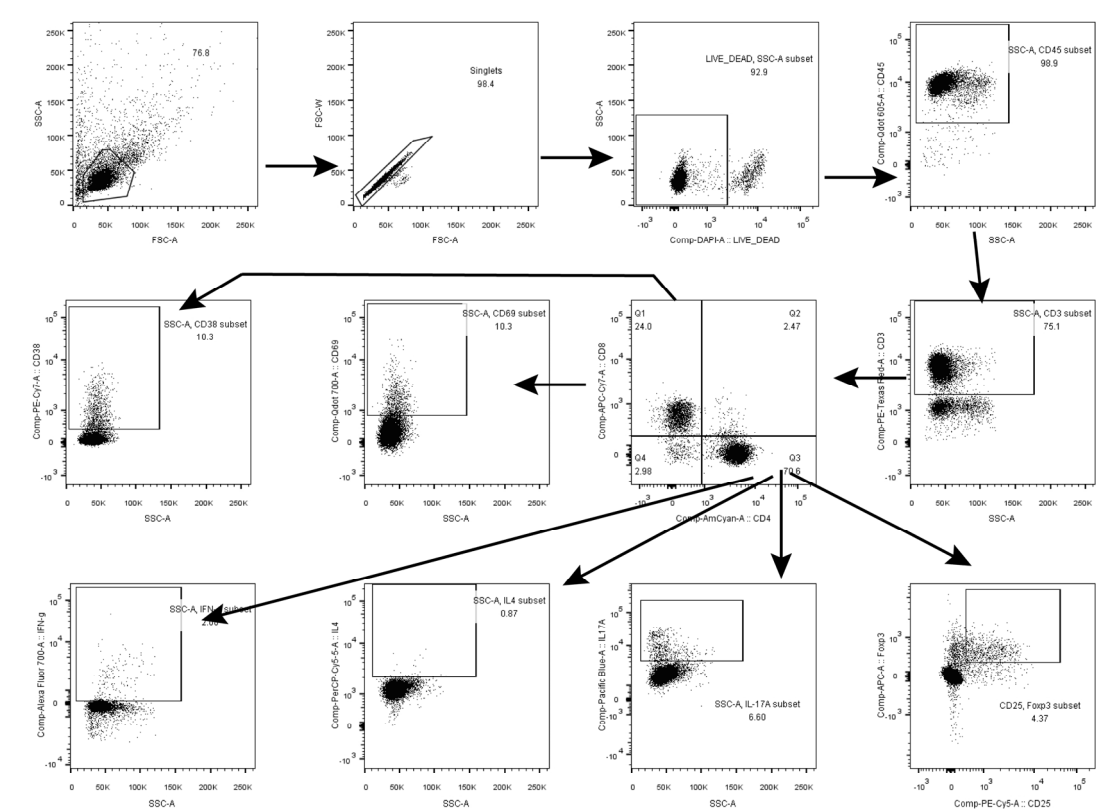

Supplementary Figure S1. Representative gating strategy for immune cells.

Supplementary Table S1. The sequence of primers for cytokines.

| Cytokines             | Sequence 5-3'            | Annealing Temperature |
|-----------------------|--------------------------|-----------------------|
| IFN- $\gamma$ Forward | TCAAGTGGCATAGATGTGGAAGAA | 60°C                  |
| IFN- $\gamma$ Reverse | TGGCTCTGCAGGATTTTCATG    |                       |
| IL-17 Forward         | CTCAAAGCTCAGCGTGTCCAAACA | 60°C                  |
| IL-17 Reverse         | TATCAGGGTCTTCATTGCGGTGGA |                       |
| IL-10 Forward         | AGCCTTATCGGAAATGATCC     | 55°C                  |
| IL-10 Reverse         | GGGAATTCAAATGCTCCTTG     |                       |
| GAPDH Forward         | AGGTCGGTGTGAACGGATTG     | 60°C                  |
| GAPDH Reverse         | TGTAGACCATGTAGTTGAGGTCA  |                       |
